# Supplementary material for: The Value of Alkaline Phosphatase-to-Albumin Ratio in Detecting Synchronous Metastases and Predicting Postoperative Relapses among Patients with Well-Differentiated Pancreatic Neuroendocrine Neoplasms
Source: Hindawi journal article supplement (doi:10.1155/2020/8927531), 2020-02-06

## Supplementary Figure 1

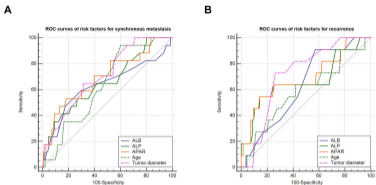

## Supplementary Figure 2

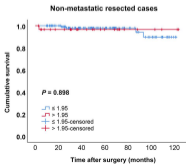

Supplement: f1 [file 8927531.f1.pdf]
